# Supplementary material for: Identification of Prognostic Alternative Splicing Signature in Breast Carcinoma
Source: Front Genet. 2019 Mar 28;10:278. doi: 10.3389/fgene.2019.00278 (PMC6448481; doi:10.3389/fgene.2019.00278)
Supplement: TABLE S1 — Collection of 67 human splicing factors from the SpliceAid 2 database. [file Table_1.XLSX]

## Sheet: Sheet1
Splicing factor	Gene Symol
hnRNP K	HNRNPK
ESRP1	ESRP1
9G8	SFRS7
CUG-BP1	CUGBP1
DAZAP1	DAZAP1
SRp20	SFRS3
SRp30c	SFRS9
SRp38	SFRS13A
SRp40	SFRS5
SRp54	SFRS11
SRp55	SFRS6
SRp75	SFRS4
ETR-3	CUGBP2
FMRP	FMR1
Fox-1	A2BP1
Fox-2	RBFOX2
hnRNP A0	HNRNPA0
hnRNP A1	HNRNPA1
hnRNP A2/B1	HNRNPA2B1
hnRNP C	HNRNPC
hnRNP D	HNRNPD
hnRNP DL	HNRPDL
hnRNP E1	PCBP1
hnRNP E2	PCBP2
hnRNP F	HNRNPF
hnRNP H1	HNRNPH1
hnRNP H2	HNRNPH2
hnRNP H3	HNRNPH3
hnRNP I (PTB)	PTBP1
hnRNP L	HNRNPL
hnRNP LL	HNRPLL
hnRNP M	HNRNPM
hnRNP P (TLS)	FUS
hnRNP U	HNRNPU
HTra2alpha	TRA2A
HTra2beta1	TRA2B
HuB	ELAVL2
HuD	ELAVL4
HuR	ELAVL1
KSRP	KHSRP
MBNL1	MBNL1
Nova-1	NOVA1
Nova-2	NOVA2
nPTB	PTBP2
PSF	SFPQ
RBM25	RBM25
RBM4	RBM4
Sam68	KHDRBS1
SAP155	SF3B1
SC35	SFRS2
SF1	SF1
SF2/ASF	SFRS1
SLM-1	KHDRBS2
SLM-2	KHDRBS3
TDP43	TARDBP
TIA-1	TIA1
TIAL1	TIAL1
YB-1	YBX1
ZRANB2	ZRANB2
HuC	ELAVL3
RBM5	RBM5
hnRNP Q	SYNCRIP
hnRNP A3	HNRNPA3
QKI	QKI
hnRNP G	RBMX
SRm160	SRRM1
ESRP2	ESRP2
